# Supplementary figures and images for: Genome-Wide Analysis of nsLTP Gene Family and Identification of SiLTPs Contributing to High Oil Accumulation in Sesame (Sesamum indicum L.)
Source: MDPI journal article supplement (doi:10.3390/ijms22105291), 2021-05-18

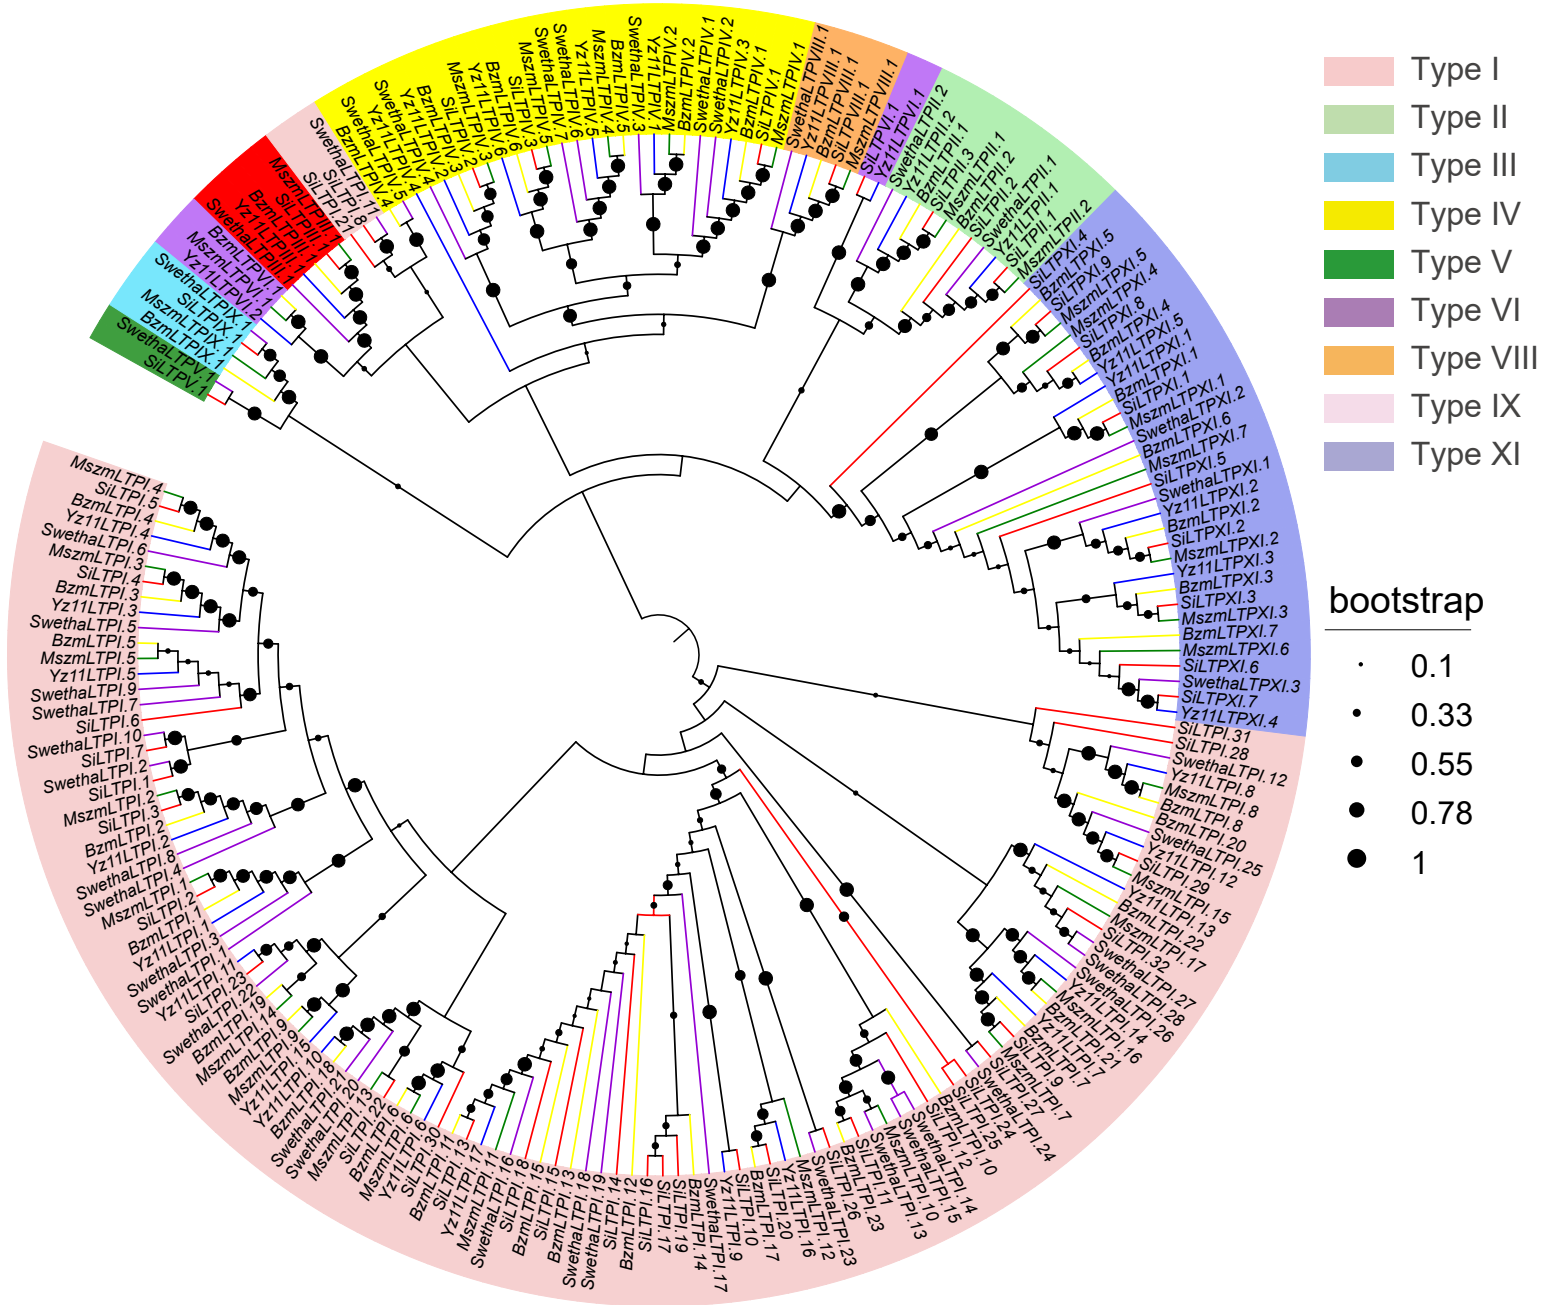

Supplement: s1 [file s1]

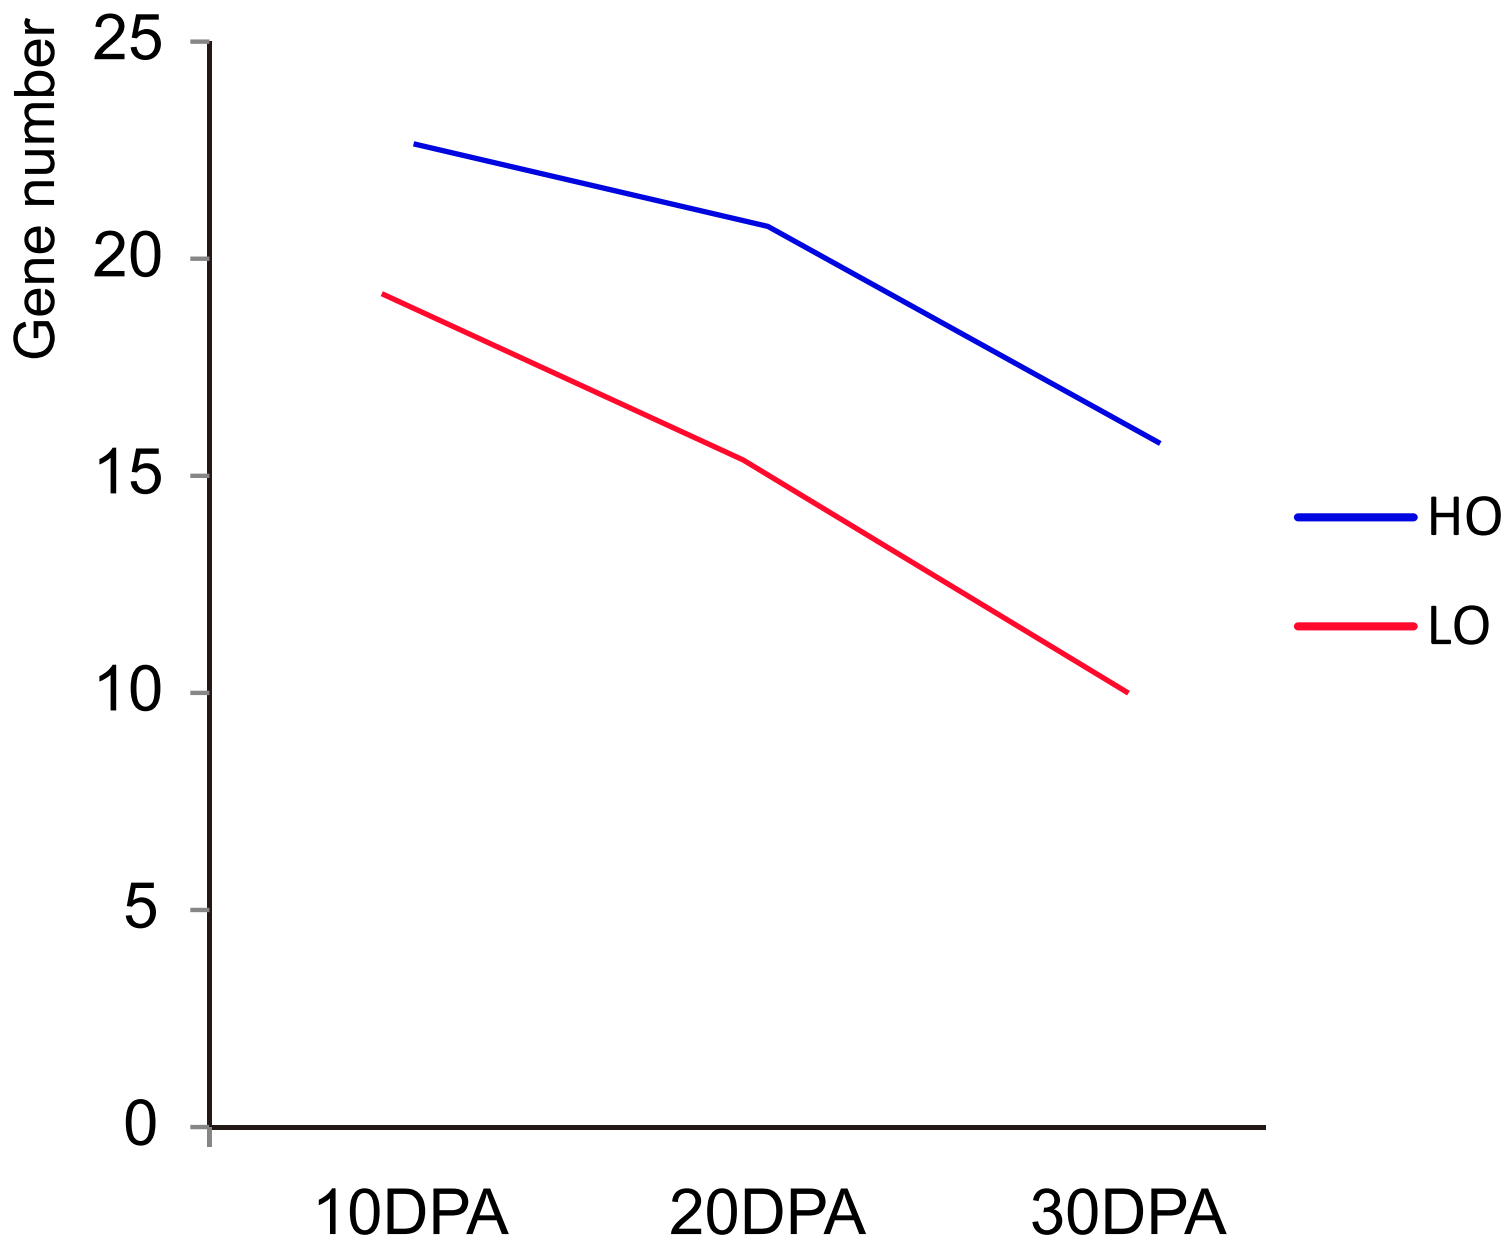

Supplement: s1 [file s1]
